# Supplementary material for: Feasibility Study of Water Reclamation Projects in Industrial Parks Incorporating Environmental Benefits: A Case Study in Chonburi, Thailand
Source: MDPI journal article supplement (doi:10.3390/w14071172), 2022-04-06
Supplement: s1 [file s1]

Archive with 1 entries (1 files):
- water-1607580-supplementary.pdf
