# Supplementary material for: Feasibility Study of Water Reclamation Projects in Industrial Parks Incorporating Environmental Benefits: A Case Study in Chonburi, Thailand
Source: MDPI journal article supplement (doi:10.3390/w14071172), 2022-04-06
Supplement: s1 [file s1 › water-1607580-supplementary.pdf]

## Supplementary materials

**Table S1.** Flow rates of wastewater to wastewater treatment plants in industrial parks in Chonburi and Rayong, which are among the most important industrial provinces in the Eastern Economic Corridor (EEC), Thailand.

| Province | Wastewater treatment plant in industrial park | Flow rate (m <sup>3</sup> /d) |
|----------|-----------------------------------------------|-------------------------------|
| Chonburi | I1                                            | 10,061 <sup>(1)*</sup>        |
|          | I2                                            | 2353 <sup>(1)*</sup>          |
|          | I3                                            | 1657 <sup>(1)*</sup>          |
|          | I4                                            | 1061 <sup>(1)*</sup>          |
|          | I5                                            | 12,704 <sup>(1)*</sup>        |
|          | I6                                            | 8613 <sup>(1)*</sup>          |
|          | I7                                            | 4053 <sup>(1)*</sup>          |
|          | I8                                            | 6962 <sup>(1)*</sup>          |
|          | I9                                            | 3058 <sup>(1)*</sup>          |
|          | I10                                           | 226 <sup>(1)*</sup>           |
|          | I11                                           | 371 <sup>(1)*</sup>           |
| Rayong   | IR1                                           | 2500 <sup>(2)</sup>           |
|          | IR2                                           | 24,564 <sup>(2)</sup>         |
|          | IR3                                           | 9821 <sup>(2)</sup>           |
|          | IR4                                           | 4159 <sup>(2)</sup>           |
|          | IR5                                           | 550 <sup>(2)</sup>            |
|          | IR6                                           | 5500 <sup>(2)</sup>           |
|          | IR7                                           | 8055 <sup>(2)</sup>           |
|          | IR8                                           | 27,200 <sup>(2)</sup>         |
|          | IR9                                           | 6735 <sup>(2)</sup>           |
|          | IR10                                          | 272.83 <sup>(2)</sup>         |

\* Data obtained in 2018.

<sup>(1)</sup> Suwannasilp, B.B.; Sangsanont, J.; Intaraburt, W.; Sanohwong, K. Survey of current situation of wastewater in the circular economy in Chonburi province and prediction of its potential. *Research Report*. **2020**.

<sup>(2)</sup> Reports on compliance with measures to prevent and mitigate environmental impacts and measures to monitor environmental impacts of industrial estates **2020**. Environmental Impact Assessment Information Center, Office of Natural Resources and Environmental Policy and Planning, Thailand. <https://eia.onep.go.th/>

**Table S2.** Concentrations of pollutants in the wastewater treatment plant effluents of industrial estates in Chonburi, according to our survey in 2018 [1].

| Pollutant                       | Concentration in the effluent (mg/L) |
|---------------------------------|--------------------------------------|
| Biochemical oxygen demand (BOD) | < 18                                 |
| Chemical oxygen demand (COD)    | 8 - 96                               |
| Total Kjeldahl nitrogen (TKN)   | < 35.99                              |
| Total phosphorus (TP)           | 0.2 - 13.5                           |
| Suspended solid (SS)            | < 42                                 |
| Total dissolved solid (TDS)     | 228 - 1432                           |
| As                              | < 0.009                              |
| Zn                              | < 2.69                               |
| Cr <sup>6+</sup>                | < 0.01                               |
| Cr <sup>3+</sup>                | < 0.211                              |
| Cu                              | < 0.21                               |
| Pb                              | < 0.05                               |
| Ni                              | < 0.8                                |
| Cd                              | < 0.01                               |
| Mn                              | < 0.87                               |
| Hg                              | < 0.05                               |
| Ba                              | < 1.02                               |
| Se                              | < 0.005                              |

\*ND = not detectable

[1] Suwannasilp, B.B.; Sangsanont, J.; Intaraburt, W.; Sanohwong, K. Survey of current situation of wastewater in the circular economy in Chonburi province and prediction of its potential. *Research Report*. **2020**.

**Table S3.** Average concentrations of pollutants and their environmental damage costs.

|                                            | <b>Nitrogen<br/>(N)*</b> | <b>Phosphorus<br/>(P)</b> | <b>Suspended<br/>solid<br/>(SS)</b> | <b>Chemical<br/>oxygen<br/>demand<br/>(COD)</b> |
|--------------------------------------------|--------------------------|---------------------------|-------------------------------------|-------------------------------------------------|
| average concentration (kg/m <sup>3</sup> ) | 0.01                     | 0.0023                    | 0.015                               | 0.044                                           |
| shadow price (THB/kg)                      | -333.45                  | -630.97                   | -0.10                               | -2.00                                           |

\*This uses an average concentration of total Kjeldahl nitrogen (TKN) because the concentrations of total nitrogen in effluents were not available.

**Table S4.** Costs and benefits of different scenarios.

| Scenario                                                   | Excluding environmental benefits                                                                                                    |                                                                                                                                 | Including environmental benefits                                                                                                   |                                                                                                                                                                   |
|------------------------------------------------------------|-------------------------------------------------------------------------------------------------------------------------------------|---------------------------------------------------------------------------------------------------------------------------------|------------------------------------------------------------------------------------------------------------------------------------|-------------------------------------------------------------------------------------------------------------------------------------------------------------------|
|                                                            | Costs                                                                                                                               | Benefits                                                                                                                        | Costs                                                                                                                              | Benefits                                                                                                                                                          |
| Water reclamation for industrial water supply              | <ul style="list-style-type: none"> <li>- Construction</li> <li>- Operation &amp; maintenance</li> </ul>                             | <ul style="list-style-type: none"> <li>- Water price</li> </ul>                                                                 | <ul style="list-style-type: none"> <li>- Construction</li> <li>- Operation &amp; maintenance</li> </ul>                            | <ul style="list-style-type: none"> <li>- Water price</li> <li>- Environmental benefits</li> </ul>                                                                 |
| Water reclamation for irrigation of plants and green areas | <ul style="list-style-type: none"> <li>- Construction</li> <li>- Pipeline systems</li> <li>- Operation &amp; maintenance</li> </ul> | <ul style="list-style-type: none"> <li>- Water price</li> <li>- Nitrogen fertilizer</li> <li>- Phosphorus fertilizer</li> </ul> | <ul style="list-style-type: none"> <li>- Construction</li> <li>- Pipeline system</li> <li>- Operation &amp; maintenance</li> </ul> | <ul style="list-style-type: none"> <li>- Water price</li> <li>- Nitrogen fertilizer</li> <li>- Phosphorus fertilizer</li> <li>- Environmental benefits</li> </ul> |

**Table S5.** Net present values (NPVs), internal rates of return (IRRs), benefit-cost ratios (BCRs), and payback periods (PPs) for water reclamation projects for industrial water supply when including and excluding environmental benefits.

| Flowrate<br>5200 m³/d   | Excluding environmental benefits |     |      |           | Including environmental benefits |       |      |           |
|-------------------------|----------------------------------|-----|------|-----------|----------------------------------|-------|------|-----------|
|                         | NPV THB)                         | IRR | BCR  | PP (year) | NPV (THB)                        | IRR   | BCR  | PP (year) |
| 3%                      | -120,836,258                     | NA  | 0.82 | > 20      | 16,826,879                       | 4.6%  | 1.03 | 16.5      |
| 5%                      | -118,784,841                     |     | 0.80 | > 20      | -3,470,449                       |       | 0.99 | > 20      |
| 7%                      | -117,198,079                     |     | 0.77 | > 20      | -19,170,340                      |       | 0.96 | > 20      |
| 9%                      | -115,953,376                     |     | 0.75 | > 20      | -31,485,801                      |       | 0.93 | > 20      |
| 11%                     | -114,963,693                     |     | 0.72 | > 20      | -41,278,021                      |       | 0.90 | > 20      |
| Flowrate<br>10,000 m³/d | Excluding environmental benefits |     |      |           | Including environmental benefits |       |      |           |
|                         | NPV (THB)                        | IRR | BCR  | PP (year) | NPV (THB)                        | IRR   | BCR  | PP (year) |
| 3%                      | -169,300,496                     | NA  | 0.86 | > 20      | 95,436,305                       | 9.2%  | 1.08 | 10.6      |
| 5%                      | -165,355,463                     |     | 0.84 | > 20      | 56,402,983                       |       | 1.05 | 12.2      |
| 7%                      | -162,303,998                     |     | 0.82 | > 20      | 26,210,886                       |       | 1.03 | 14.6      |
| 9%                      | -159,910,338                     |     | 0.80 | > 20      | 2,527,307                        |       | 1.00 | 19.1      |
| 11%                     | -158,007,101                     |     | 0.78 | > 20      | -16,303,887                      |       | 0.98 | > 20      |
| Flowrate<br>15,000 m³/d | Excluding environmental benefits |     |      |           | Including environmental benefits |       |      |           |
|                         | NPV (THB)                        | IRR | BCR  | PP (year) | NPV (THB)                        | IRR   | BCR  | PP (year) |
| 3%                      | -223,450,743                     | NA  | 0.88 | > 20      | 173,654,458                      | 11.5% | 1.10 | 8.9       |
| 5%                      | -217,533,194                     |     | 0.86 | > 20      | 115,104,474                      |       | 1.07 | 10.0      |
| 7%                      | -212,955,997                     |     | 0.84 | > 20      | 69,816,328                       |       | 1.05 | 11.5      |
| 9%                      | -209,365,507                     |     | 0.82 | > 20      | 34,290,960                       |       | 1.03 | 13.7      |
| 11%                     | -206,510,652                     |     | 0.80 | > 20      | 6,044,170                        |       | 1.01 | 18.0      |
| Flowrate<br>25,000 m³/d | Excluding environmental benefits |     |      |           | Including environmental benefits |       |      |           |
|                         | NPV (THB)                        | IRR | BCR  | PP (year) | NPV (THB)                        | IRR   | BCR  | PP (year) |
| 3%                      | -392,751,239                     | NA  | 0.87 | > 20      | 269,090,764                      | 10.5% | 1.09 | 9.6       |
| 5%                      | -382,888,657                     |     | 0.85 | > 20      | 171,507,457                      |       | 1.07 | 10.8      |
| 7%                      | -375,259,995                     |     | 0.83 | > 20      | 96,027,214                       |       | 1.04 | 12.6      |
| 9%                      | -369,275,846                     |     | 0.82 | > 20      | 36,818,266                       |       | 1.02 | 15.6      |
| 11%                     | -364,517,753                     |     | 0.80 | > 20      | -10,259,717                      |       | 0.99 | > 20      |

\*NA = not applicable

**Table S6.** Net present values (NPVs), internal rates of return (IRRs), benefit-cost ratios (BCRs), and payback periods (PPs) for water reclamation projects for irrigation of plants and green areas when including and excluding environmental benefits.

| Flowrate<br>240 m³/d  | Excluding environmental benefits |       |      |           | Including environmental benefits |       |      |           |
|-----------------------|----------------------------------|-------|------|-----------|----------------------------------|-------|------|-----------|
|                       | NPV (THB)                        | IRR   | BCR  | PP (year) | NPV (THB)                        | IRR   | BCR  | PP (year) |
| 3%                    | 11,002,646                       | 45.5% | 3.27 | 2.31      | 17,356,329                       | 68.0% | 4.59 | 1.53      |
| 5%                    | 8,907,171                        |       | 3.04 | 2.39      | 14,229,373                       |       | 4.26 | 1.57      |
| 7%                    | 7,286,330                        |       | 2.82 | 2.47      | 11,810,687                       |       | 3.96 | 1.61      |
| 9%                    | 6,014,895                        |       | 2.62 | 2.57      | 9,913,398                        |       | 3.68 | 1.66      |
| 11%                   | 5,003,956                        |       | 2.44 | 2.66      | 8,404,833                        |       | 3.42 | 1.70      |
| Flowrate<br>480 m³/d  | Excluding environmental benefits |       |      |           | Including environmental benefits |       |      |           |
|                       | NPV (THB)                        | IRR   | BCR  | PP (year) | NPV (THB)                        | IRR   | BCR  | PP (year) |
| 3%                    | 22,945,292                       | 60.5% | 3.63 | 1.72      | 35,652,658                       | 90.2% | 5.08 | 1.15      |
| 5%                    | 18,754,341                       |       | 3.41 | 1.77      | 29,398,747                       |       | 4.78 | 1.17      |
| 7%                    | 15,512,660                       |       | 3.20 | 1.82      | 24,561,375                       |       | 4.49 | 1.20      |
| 9%                    | 12,969,789                       |       | 3.01 | 1.88      | 20,766,796                       |       | 4.21 | 1.23      |
| 11%                   | 10,947,912                       |       | 2.82 | 1.93      | 17,749,666                       |       | 3.95 | 1.26      |
| Flowrate<br>2400 m³/d | Excluding environmental benefits |       |      |           | Including environmental benefits |       |      |           |
|                       | NPV (THB)                        | IRR   | BCR  | PP (year) | NPV (THB)                        | IRR   | BCR  | PP (year) |
| 3%                    | 114,281,458                      | 58.6% | 3.59 | 1.78      | 177,818,290                      | 87.5% | 5.03 | 1.18      |
| 5%                    | 93,326,706                       |       | 3.37 | 1.83      | 146,548,733                      |       | 4.72 | 1.21      |
| 7%                    | 77,118,302                       |       | 3.16 | 1.88      | 122,361,874                      |       | 4.43 | 1.24      |
| 9%                    | 64,403,947                       |       | 2.96 | 1.94      | 103,388,982                      |       | 4.15 | 1.27      |
| 11%                   | 54,294,560                       |       | 2.78 | 1.99      | 88,303,331                       |       | 3.90 | 1.30      |

**Table S6.** Net present values (NPVs), internal rates of return (IRRs), benefit-cost ratios (BCRs), and payback periods (PPs) for water reclamation projects for irrigation of plants and green areas when including and excluding environmental benefits. (continued)

| Flowrate<br>3600 m³/d | Excluding environmental benefits |       |      |           | Including environmental benefits |        |      |           |
|-----------------------|----------------------------------|-------|------|-----------|----------------------------------|--------|------|-----------|
|                       | NPV (THB)                        | IRR   | BCR  | PP (year) | NPV (THB)                        | IRR    | BCR  | PP (year) |
| 3%                    | 174,819,687                      | 69.2% | 3.78 | 1.50      | 270,124,935                      | 103.3% | 5.30 | 1.00      |
| 5%                    | 143,387,560                      |       | 3.58 | 1.54      | 223,220,600                      |        | 5.01 | 1.02      |
| 7%                    | 119,074,952                      |       | 3.38 | 1.58      | 186,940,310                      |        | 4.73 | 1.04      |
| 9%                    | 100,003,420                      |       | 3.18 | 1.63      | 158,480,972                      |        | 4.46 | 1.06      |
| 11%                   | 84,839,339                       |       | 3.00 | 1.67      | 135,852,497                      |        | 4.21 | 1.08      |
| Flowrate<br>4800 m³/d | Excluding environmental benefits |       |      |           | Including environmental benefits |        |      |           |
|                       | NPV (THB)                        | IRR   | BCR  | PP (year) | NPV (THB)                        | IRR    | BCR  | PP (year) |
| 3%                    | 228,942,916                      | 59.4% | 3.61 | 1.76      | 356,016,580                      | 88.6%  | 5.05 | 1.17      |
| 5%                    | 187,033,413                      |       | 3.39 | 1.81      | 293,477,467                      |        | 4.75 | 1.19      |
| 7%                    | 154,616,603                      |       | 3.18 | 1.86      | 245,103,747                      |        | 4.45 | 1.22      |
| 9%                    | 129,187,894                      |       | 2.98 | 1.91      | 207,157,963                      |        | 4.18 | 1.25      |
| 11%                   | 108,969,119                      |       | 2.80 | 1.96      | 176,986,662                      |        | 3.92 | 1.28      |

**Table S7.** Costs and benefits in NPVs of water reclamation projects for industrial water supply.

| Flowrate<br>(m <sup>3</sup> /d) | Discount<br>rate | Present values of costs (THB) |               | Present values of benefits (THB) |                           | NPV (THB)                              |                                        |
|---------------------------------|------------------|-------------------------------|---------------|----------------------------------|---------------------------|----------------------------------------|----------------------------------------|
|                                 |                  | Construction                  | O&M           | Water price                      | Environmental<br>benefits | Excluding<br>environmental<br>benefits | Including<br>environmental<br>benefits |
| 5200                            | 3%               | 108,200,000                   | 564,748,946   | 552,112,688                      | 137,663,136               | -120,836,258                           | 16,826,879                             |
|                                 | 5%               | 108,200,000                   | 473,065,505   | 462,480,664                      | 115,314,392               | -118,784,841                           | -3,470,449                             |
|                                 | 7%               | 108,200,000                   | 402,148,781   | 393,150,702                      | 98,027,739                | -117,198,079                           | -19,170,340                            |
|                                 | 9%               | 108,200,000                   | 346,519,594   | 338,766,218                      | 84,467,575                | -115,953,376                           | -31,485,801                            |
|                                 | 11%              | 108,200,000                   | 302,287,935   | 295,524,243                      | 73,685,672                | -114,963,693                           | -41,278,021                            |
| 10,000                          | 3%               | 145,000,000                   | 1,086,055,665 | 1,061,755,169                    | 264,736,801               | -169,300,496                           | 95,436,305                             |
|                                 | 5%               | 145,000,000                   | 909,741,355   | 889,385,892                      | 221,758,446               | -165,355,463                           | 56,402,983                             |
|                                 | 7%               | 145,000,000                   | 773,363,040   | 756,059,042                      | 188,514,884               | -162,303,998                           | 26,210,886                             |
|                                 | 9%               | 145,000,000                   | 666,383,834   | 651,473,496                      | 162,437,645               | -159,910,338                           | 2,527,307                              |
|                                 | 11%              | 145,000,000                   | 581,322,953   | 568,315,852                      | 141,703,214               | -158,007,101                           | -16,303,887                            |
| 15,000                          | 3%               | 187,000,000                   | 1,629,083,497 | 1,592,632,754                    | 397,105,201               | -223,450,743                           | 173,654,458                            |
|                                 | 5%               | 187,000,000                   | 1,364,612,033 | 1,334,078,838                    | 332,637,668               | -217,533,194                           | 115,104,474                            |
|                                 | 7%               | 187,000,000                   | 1,160,044,560 | 1,134,088,563                    | 282,772,325               | -212,955,997                           | 69,816,328                             |
|                                 | 9%               | 187,000,000                   | 999,575,751   | 977,210,243                      | 243,656,467               | -209,365,507                           | 34,290,960                             |
|                                 | 11%              | 187,000,000                   | 871,984,429   | 852,473,777                      | 212,554,822               | -206,510,652                           | 6,044,170                              |
| 25,000                          | 3%               | 332,000,000                   | 2,715,139,162 | 2,654,387,923                    | 661,842,002               | -392,751,239                           | 269,090,764                            |
|                                 | 5%               | 332,000,000                   | 2,274,353,388 | 2,223,464,730                    | 554,396,114               | -382,888,657                           | 171,507,457                            |
|                                 | 7%               | 332,000,000                   | 1,933,407,600 | 1,890,147,605                    | 471,287,209               | -375,259,995                           | 96,027,214                             |
|                                 | 9%               | 332,000,000                   | 1,665,959,585 | 1,628,683,739                    | 406,094,112               | -369,275,846                           | 36,818,266                             |
|                                 | 11%              | 332,000,000                   | 1,453,307,381 | 1,420,789,629                    | 354,258,036               | -364,517,753                           | -10,259,717                            |

**Table S8.** Costs and benefits in NPVs of water reclamation projects for water reclamation projects for irrigation of plants and green areas.

| Flowrate<br>(m <sup>3</sup> /d) | Discount<br>rate | Present values of costs (THB) |                    |            | Present values of benefits (THB) |                        |                          |                           | NPV (THB)                              |                                        |
|---------------------------------|------------------|-------------------------------|--------------------|------------|----------------------------------|------------------------|--------------------------|---------------------------|----------------------------------------|----------------------------------------|
|                                 |                  | Construction                  | Pipeline<br>system | O&M        | Water price                      | Nitrogen<br>fertilizer | Phosphorus<br>fertilizer | Environmental<br>benefits | Excluding<br>environmental<br>benefits | Including<br>environmental<br>benefits |
| 240                             | 3%               | 1,400,000                     | 505,000            | 2,932,350  | 15,639,202                       | 149,446                | 51,349                   | 6,353,683                 | 11,002,646                             | 17,356,329                             |
|                                 | 5%               | 1,400,000                     | 505,000            | 2,456,302  | 13,100,276                       | 125,184                | 43,013                   | 5,322,203                 | 8,907,171                              | 14,229,373                             |
|                                 | 7%               | 1,400,000                     | 505,000            | 2,088,080  | 11,136,428                       | 106,418                | 36,565                   | 4,524,357                 | 7,286,330                              | 11,810,687                             |
|                                 | 9%               | 1,400,000                     | 505,000            | 1,799,236  | 9,595,927                        | 91,697                 | 31,507                   | 3,898,503                 | 6,014,895                              | 9,913,398                              |
|                                 | 11%              | 1,400,000                     | 505,000            | 1,569,572  | 8,371,051                        | 79,992                 | 27,485                   | 3,400,877                 | 5,003,956                              | 8,404,833                              |
| 480                             | 3%               | 2,000,000                     | 870,000            | 5,864,701  | 31,278,403                       | 298,891                | 102,698                  | 12,707,366                | 22,945,292                             | 35,652,658                             |
|                                 | 5%               | 2,000,000                     | 870,000            | 4,912,603  | 26,200,551                       | 250,368                | 86,025                   | 10,644,405                | 18,754,341                             | 29,398,747                             |
|                                 | 7%               | 2,000,000                     | 870,000            | 4,176,160  | 22,272,856                       | 212,836                | 73,129                   | 9,048,714                 | 15,512,660                             | 24,561,375                             |
|                                 | 9%               | 2,000,000                     | 870,000            | 3,598,473  | 19,191,854                       | 183,394                | 63,013                   | 7,797,007                 | 12,969,789                             | 20,766,796                             |
|                                 | 11%              | 2,000,000                     | 870,000            | 3,139,144  | 16,742,101                       | 159,985                | 54,970                   | 6,801,754                 | 10,947,912                             | 17,749,666                             |
| 2400                            | 3%               | 12,000,000                    | 2,795,000          | 29,323,503 | 156,392,016                      | 1,494,456              | 513,489                  | 63,536,832                | 114,281,458                            | 177,818,290                            |
|                                 | 5%               | 12,000,000                    | 2,795,000          | 24,563,017 | 131,002,755                      | 1,251,840              | 430,127                  | 53,222,027                | 93,326,706                             | 146,548,733                            |
|                                 | 7%               | 12,000,000                    | 2,795,000          | 20,880,802 | 111,364,278                      | 1,064,178              | 365,647                  | 45,243,572                | 77,118,302                             | 122,361,874                            |
|                                 | 9%               | 12,000,000                    | 2,795,000          | 17,992,364 | 95,959,272                       | 916,971                | 315,067                  | 38,985,035                | 64,403,947                             | 103,388,982                            |
|                                 | 11%              | 12,000,000                    | 2,795,000          | 15,695,720 | 83,710,505                       | 799,924                | 274,851                  | 34,008,771                | 54,294,560                             | 88,303,331                             |
| 3600                            | 3%               | 16,000,000                    | 2,795,000          | 43,985,254 | 234,588,024                      | 2,241,684              | 770,234                  | 95,305,248                | 174,819,687                            | 270,124,935                            |
|                                 | 5%               | 16,000,000                    | 2,795,000          | 36,844,525 | 196,504,133                      | 1,877,761              | 645,191                  | 79,833,040                | 143,387,560                            | 223,220,600                            |
|                                 | 7%               | 16,000,000                    | 2,795,000          | 31,321,203 | 167,046,417                      | 1,596,268              | 548,471                  | 67,865,358                | 119,074,952                            | 186,940,310                            |
|                                 | 9%               | 16,000,000                    | 2,795,000          | 26,988,545 | 143,938,908                      | 1,375,456              | 472,601                  | 58,477,552                | 100,003,420                            | 158,480,972                            |
|                                 | 11%              | 16,000,000                    | 2,795,000          | 23,543,580 | 125,565,758                      | 1,199,885              | 412,276                  | 51,013,157                | 84,839,339                             | 135,852,497                            |
| 4800                            | 3%               | 24,000,000                    | 5,210,000          | 58,647,006 | 312,784,031                      | 2,988,912              | 1,026,978                | 127,073,664               | 228,942,916                            | 356,016,580                            |
|                                 | 5%               | 24,000,000                    | 5,210,000          | 49,126,033 | 262,005,510                      | 2,503,681              | 860,255                  | 106,444,054               | 187,033,413                            | 293,477,467                            |
|                                 | 7%               | 24,000,000                    | 5,210,000          | 41,761,604 | 222,728,555                      | 2,128,357              | 731,295                  | 90,487,144                | 154,616,603                            | 245,103,747                            |
|                                 | 9%               | 24,000,000                    | 5,210,000          | 35,984,727 | 191,918,544                      | 1,833,942              | 630,135                  | 77,970,070                | 129,187,894                            | 207,157,963                            |
|                                 | 11%              | 24,000,000                    | 5,210,000          | 31,391,439 | 167,421,010                      | 1,599,847              | 549,701                  | 68,017,543                | 108,969,119                            | 176,986,662                            |

**Table S9.** Actual amount of irrigation water from water reuse in industrial parks in Chonburi in 2018 [1].

| Industrial park/zone | Irrigation flow rate (m <sup>3</sup> /d) |
|----------------------|------------------------------------------|
| I2                   | 43                                       |
| I3                   | 44                                       |
| I4                   | 56                                       |
| I5                   | 2922                                     |
| I6                   | 1981                                     |
| I7                   | 932                                      |
| I8                   | 1601                                     |

\*I5-I8 are zones where wastewater is collected to different wastewater treatment plants but they are located in the same industrial park.

\*These industrial parks/zones used only reclaimed water for irrigation of plants and green areas.

[1] Suwannasilp, B.B.; Sangsanont, J.; Intaraburt, W.; Sanohwong, K. Survey of current situation of wastewater in the circular economy in Chonburi province and prediction of its potential. *Research Report*. **2020**.

**Text S1.** Calculation of irrigation water demand

For water demand of green areas in an industrial park, crop evapotranspiration (ET<sub>c</sub>) of grass was estimated from crop coefficient (K<sub>c</sub>) and reference crop evapotranspiration (ET<sub>o</sub>) as shown in equation S-1.

$$ET_c = K_c \times ET_o \quad (S-1)$$

The K<sub>c</sub> of grass was obtained from Royal Irrigation Department (RID) ([http://water.rid.go.th/hwm/cropwater/iwmd/pdf/rev\\_cwr\\_manual.pdf](http://water.rid.go.th/hwm/cropwater/iwmd/pdf/rev_cwr_manual.pdf)) and the ET<sub>o</sub> for Chonburi province based on Penman-Montieth equation was obtained from RID ([http://water.rid.go.th/hwm/cropwater/CWRdata/ETo/eto\\_east.pdf](http://water.rid.go.th/hwm/cropwater/CWRdata/ETo/eto_east.pdf)).

Irrigation water demand was calculated from the difference between grass evapotranspiration (ET<sub>c</sub>) and effective rainfall in each month (m) as shown in equation S-2

$$\text{Irrigation water (m)} = ET_c \text{ (m)} - \text{Effective rainfall (m)} \quad (S-2)$$

The 30-year average rainfall data (1981-2010) in Chonburi province were from Thai Meteorological Department (TMD) [https://www.tmd.go.th/province\\_weather\\_stat.php?StationNumber=48459](https://www.tmd.go.th/province_weather_stat.php?StationNumber=48459) and the effective monthly rainfall was calculated as shown in Table S based on a guideline from RID. The irrigation water demand of grass is shown in Table S.

**Table S10.** Effective monthly rainfall in Chonburi [RID]

| Monthly rainfall (MR) | Effective rainfall |
|-----------------------|--------------------|
| 0-10                  | 0                  |
| 11-100                | MR x 0.8           |
| 101-200               | MR x 0.7           |
| 201-250               | MR x 0.6           |
| 251-300               | MR x 0.55          |
| > 300                 | MR x 0.5           |

**Table S11.** Irrigation water demand of grass in Chonburi

| Month | ETo (Penman-Monteith)<br>mm/day | Kc (grass) | ETc<br>mm/day | Rainfall (1981-2010)<br>mm/mon | Rainfall<br>mm/day | Eff. Rainfall<br>mm/day | Irrigation water<br>mm/day |
|-------|---------------------------------|------------|---------------|--------------------------------|--------------------|-------------------------|----------------------------|
| Jan   | 4.09                            | 0.85       | 3.48          | 9.9                            | 0.3                | 0.0                     | 3.5                        |
| Feb   | 4.55                            | 1.24       | 5.64          | 14.3                           | 0.5                | 0.4                     | 5.2                        |
| Mar   | 4.83                            | 0.57       | 2.75          | 47.5                           | 1.5                | 1.2                     | 1.5                        |
| Apr   | 5.14                            | 1.05       | 5.40          | 74.1                           | 2.5                | 2.0                     | 3.4                        |
| May   | 4.48                            | 0.88       | 3.94          | 175.3                          | 5.7                | 4.0                     | 0.0                        |
| Jun   | 4.13                            | 1.23       | 5.08          | 147.7                          | 4.9                | 3.4                     | 1.6                        |
| Jul   | 4.12                            | 1.03       | 4.24          | 140.6                          | 4.5                | 3.2                     | 1.1                        |
| Aug   | 3.74                            | 0.98       | 3.67          | 154.1                          | 5.0                | 3.5                     | 0.2                        |
| Sep   | 3.43                            | 0.77       | 2.64          | 268.9                          | 9.0                | 5.4                     | 0.0                        |
| Oct   | 3.49                            | 1.09       | 3.80          | 208.9                          | 6.7                | 4.0                     | 0.0                        |
| Nov   | 4.09                            | 0.58       | 2.37          | 48.8                           | 1.6                | 1.3                     | 1.1                        |
| Dec   | 4.16                            | 1.24       | 5.16          | 5.5                            | 0.2                | 0.0                     | 5.2                        |
|       |                                 |            |               |                                |                    | Average                 | 1.9                        |

The irrigated green areas based on the flow rate scenarios and the average irrigation water of grass of 1.9 mm/day is shown in Table S- assuming irrigation efficiency of 70%.

**Table S12.** The irrigated green areas based on flow rate scenarios

|                                 |     |     |      |      |      |
|---------------------------------|-----|-----|------|------|------|
| Flow rate (m <sup>3</sup> /day) | 240 | 480 | 2400 | 3600 | 4800 |
| Irrigated green area (ha)       | 9   | 18  | 88   | 133  | 177  |
